# Supplementary material
Source: PubMed Central journal article supplement (PMC4135757)
Supplement: AEM.00957-14_zam999105551so1.pdf [file AEM.00957-14_zam999105551so1.pdf]

1 **Supplemental Material**

2 Supplemental Tables

3 Table S1. Megyesi table of decomposition. State of decomposition is described from  
4 visual inspection of the carcass. Points for each visual state at each body site are  
5 indicated in the table. 'NA' indicates the category is not applicable to that body site.

6

| Decomposition Stage and Grade            | Head | Trunk | Limbs |
|------------------------------------------|------|-------|-------|
| Fresh                                    |      |       |       |
| No discoloration                         | 1    | 1     | 1     |
| Early Decomposition                      |      |       |       |
| Discoloration                            | 2    | 2     | 2     |
| Purging of fluids from eyes, nose, mouth | 3    | NA    | NA    |
| Bloating of neck and/or face             | 3    | 3     | NA    |
| Rupture and/or purging                   | NA   | 4     | NA    |
| Advanced Decomposition                   |      |       |       |
| Sagging of flesh                         | 5    | 5     | NA    |
| Sinking of flesh                         | 6    | 6     | NA    |
| Caving in of flesh                       | 7    | 7     | NA    |
| Mummification                            | 8    | 8     | NA    |
| Dessication and/or mummification         | NA   | NA    | 3     |

7

8

9 Table S2. Faith's Phylogenetic Diversity (PD) of eukaryotic and bacterial communities.

10 Mean and SEM (in parentheses) are presented for treatment and stage of

11 decomposition at each body site and for the soil. Means without SEM had on one

12 sample for analysis. NA indicates the samples did not produce sequences for analysis.

13

|                         | 18S<br>Mean PD (SEM) | 16S<br>Mean PD (SEM) |
|-------------------------|----------------------|----------------------|
| <b>Abdominal Cavity</b> |                      |                      |
| Sterile-Early           | 17 (7.1)             | 11 (1.9)             |
| Sterile-Late            | NA                   | 9.6 (0.85)           |
| Untreated-Early         | NA                   | 13                   |
| Untreated-Late          | 83 (0.07)            | 9.3 (1.3)            |
| <b>Skin of Head</b>     |                      |                      |
| Sterile-Early           | NA                   | NA                   |
| Sterile-Late            | 36 (10)              | 5.8 (0.25)           |
| Untreated-Early         | 77                   | 10 (2)               |
| Untreated-Late          | 61 (13)              | 7 (0.27)             |
| <b>Skin of Torso</b>    |                      |                      |
| Sterile-Early           | 62 (33)              | 11 (0.24)            |
| Sterile-Late            | 47 (13)              | 5.3 (0.25)           |
| Untreated-Early         | NA                   | 6.2                  |
| Untreated-Late          | 26 (4.4)             | 4.8 (0.3)            |
| <b>Soil</b>             |                      |                      |
| Sterile-Early           | 36 (9.9)             | 5.2 (0.5)            |
| Sterile-Late            | NA                   | 7.6 (0.78)           |
| Untreated-Early         | 102 (2.3)            | 25 (2.2)             |
| Untreated-Late          | 107 (1.7)            | 24 (0.84)            |

14

15

16

17

18

19

20

21

22

23

24

25

26 Table S3. The number of samples that were used for 18S and 16S analyses. Only late  
 27 stage decomposition samples were compared by statistical methods. 'NA' indicates no  
 28 sample produced enough sequences for analysis after quality filtering and rarefaction.  
 29

|                  | Treatment     |              |                 |                |
|------------------|---------------|--------------|-----------------|----------------|
|                  | Early Sterile | Late Sterile | Early Untreated | Late Untreated |
| 18S              |               |              |                 |                |
| Abdominal Cavity | NA            | 5            | NA              | 2              |
| Skin of Torso    | NA            | 7            | NA              | 9              |
| Skin of Head     | NA            | 10           | NA              | 8              |
| Soil             | NA            | 8            | 5               | 10             |
| 16S              |               |              |                 |                |
| Abdominal Cavity | 2             | 8            | 1               | 8              |
| Skin of Torso    | 3             | 8            | 1               | 7              |
| Skin of Head     | 1             | 10           | 1               | 10             |
| Soil             | 2             | 4            | 3               | 8              |

30

31

32

33

34

35

36

37 Table S4. Mean and (SEM) of eukaryotic taxa classified to the species level for sterile  
 38 and untreated soils with abundances greater than 0.5%. Early samples correspond to  
 39 T0, late samples include T3 and 4 for the untreated soil, T5 and 6 for sterile soils.  
 40 Asterisks (\*) indicate a significant difference in abundance at late stage decomposition  
 41 for sterile and untreated soil using a bootstrapped Mann-Whitney U test with Bonferroni  
 42 correction of the p-value.

|                                   | Treatment     |              |                 |                |
|-----------------------------------|---------------|--------------|-----------------|----------------|
|                                   | Early Sterile | Late Sterile | Early Untreated | Late Untreated |
| <b>Abominal Cavity</b>            |               |              |                 |                |
| Eurotiomycetes                    |               | 99 (0.2)     |                 | 9.9 (1.4)      |
| Saccharomycetales                 |               | 0.3 (0.2)    |                 | 65 (23)        |
| Polar-centric-Coscinodiscophyceae |               | 0 (0)        |                 | 7.6 (7.6)      |
| Opisthokonta                      |               | 0 (0)        |                 | 6.9 (6.9)      |
| Basidiomycota                     |               | 0 (0)        |                 | 5.9 (3.9)      |
| Agaricomycetes                    |               | 0 (0)        |                 | 2.9 (2.9)      |
| <b>Skin of Torso</b>              |               |              |                 |                |
| Eurotiomycetes*                   | 0.5 (0.4)     | 73 (13.4)    |                 | 0.5 (0.2)      |
| Mucoromycotina*                   | 0.1 (0.1)     | 0 (0)        |                 | 62 (10)        |
| Sordariomycetes                   | 0 (0)         | 9.6 (9.5)    |                 | 20 (8.4)       |
| Chromadorea                       | 0 (0)         | 0.1 (0)      |                 | 15 (8.8)       |
| Tritrichomonadidae                | 7.5 (5.3)     | 0 (0)        |                 | 0 (0)          |
| Dothideomycetes*                  | 0.1 (0.1)     | 15 (10.2)    |                 | 0 (0)          |
| Cristamonadida                    | 18 (13)       | 0 (0)        |                 | 0 (0)          |
| Saccharomycetales                 | 27 (19)       | 0.2 (0.1)    |                 | 0.4 (0.2)      |
| <b>Skin of Head</b>               |               |              |                 |                |
| Eurotiomycetes*                   |               | 98 (1.2)     |                 | 0.2 (0.1)      |
| Chromadorea                       |               | 1.2 (0.9)    |                 | 37 (14)        |
| Mucoromycotina*                   |               | 0.1 (0)      |                 | 36 (14)        |
| Agaricomycetes                    |               | 0 (0)        |                 | 16 (11)        |
| Oomyceta                          |               | 0 (0)        |                 | 8.1 (8.1)      |
| <b>Soil</b>                       |               |              |                 |                |
| Eurotiomycetes*                   |               | 66 (13)      | 0.6 (0.1)       | 0.5 (0)        |
| Gregarines*                       |               | 0.1 (0.1)    | 13 (1.8)        | 16 (2.5)       |
| Agaricomycetes*                   |               | 0.3 (0.3)    | 8.2 (0.5)       | 15 (2.5)       |
| Leotiomycetes*                    |               | 0.2 (0.1)    | 5.3 (1)         | 1.8 (0.2)      |
| Mucoromycotina*                   |               | 0 (0)        | 3.9 (0.9)       | 17 (2.9)       |
| Dothideomycetes                   |               | 11 (5)       | 2.8 (0.3)       | 1.3 (0.3)      |
| Oomyceta*                         |               | 0 (0)        | 7.5 (0.8)       | 8.5 (1.7)      |
| Chromadorea*                      |               | 0 (0)        | 3.2 (0.5)       | 7.6 (2.8)      |
| Sordariomycetes                   |               | 12 (11.3)    | 0 (0)           | 0 (0)          |
| Pezizomycotina*                   |               | 8.2 (8.2)    | 1.1 (0.2)       | 0.1 (0)        |
| Stichotrichia*                    |               | 0 (0)        | 7.5 (3.3)       | 2.8 (0.5)      |
| Clade-C*                          |               | 0 (0)        | 3.3 (0.3)       | 2.3 (0.3)      |
| Haptoria*                         |               | 0 (0)        | 2.6 (0.5)       | 2.2 (0.7)      |
| Cercomonadidae*                   |               | 0 (0)        | 3 (0.3)         | 1.6 (0.1)      |
| Chytridiomycetes*                 |               | 0 (0)        | 1.9 (0.5)       | 2 (0.7)        |
| Conosa*                           |               | 0 (0)        | 2.3 (0.7)       | 0.8 (0.1)      |
| Glomeromycotina*                  |               | 0 (0)        | 1.9 (0.3)       | 0.9 (0.1)      |
| Tremellomycetes*                  |               | 0 (0)        | 1.3 (0.6)       | 0.8 (0.3)      |
| Plasmodiophorida*                 |               | 0 (0)        | 1.1 (0.3)       | 1 (0.1)        |
| Hyphochytriaceae*                 | 4             | 0 (0)        | 1.1 (0.4)       | 0.7 (0.1)      |
| Microsporidiomycotina*            |               | 0 (0)        | 0.7 (0.2)       | 0.8 (0.2)      |

44 Table S5. Mean and (SEM) of bacterial taxa classified to the species level for sterile and  
45 untreated soils with abundances greater than 0.5%. Early samples correspond to T0,  
46 late samples include T3 and 4 for the untreated soil, T5 and 6 for sterile soils. Asterisks  
47 (\*) indicate a significant difference in abundance at late stage decomposition for sterile  
48 and untreated soil using a bootstrapped Mann-Whitney U test with Bonferroni correction  
49 of the p-value.

|                            | Treatment     |              |                 |                |
|----------------------------|---------------|--------------|-----------------|----------------|
|                            | Early Sterile | Late Sterile | Early Untreated | Late Untreated |
| <b>Abdominal Cavity</b>    |               |              |                 |                |
| Enterococcus*              | 0.37 (0.3)    | 24 (6)       | 0               | 6.3 (2.2)      |
| Morganella                 | 0             | 0.01 (0)     | 0               | 30 (14)        |
| Clostridium                | 0             | 0            | 0               | 11 (11)        |
| Bacteroides                | 0.13 (0.1)    | 2.2 (1.1)    | 0.63            | 5 (3.1)        |
| Lactobacillus              | 0.03 (0)      | 0.76 (0.5)   | 0.07            | 2 (1.5)        |
| Mucispirillum              | 0.93 (0.9)    | 0.67 (0.5)   | 5.1             | 1.2 (0.5)      |
| Proteus                    | 0.02 (0)      | 0            | 0               | 2.6 (1.2)      |
| Ruminococcus               | 0.93 (0.9)    | 0.87 (0.4)   | 2.1             | 0.64 (0.2)     |
| Oscillospira               | 0.92 (0.9)    | 0.57 (0.4)   | 3.5             | 0.5 (0.2)      |
| Parabacteroides            | 1.5 (1.2)     | 0.61 (0.3)   | 0.23            | 0.42 (0.3)     |
| <b>Skin of Toroso</b>      |               |              |                 |                |
| Morganella*                | 0             | 0.35 (0.3)   | 54              | 48 (16)        |
| Bacillus                   | 0             | 20 (12)      | 0.1             | 13 (13)        |
| Lactobacillus              | 12 (1.9)      | 0            | 0               | 0              |
| Proteus*                   | 0             | 0            | 4.9             | 4.2 (1.4)      |
| Burkholderia               | 0             | 2.2 (1.2)    | 0               | 0              |
| Enterococcus               | 0             | 1.9 (1.9)    | 0               | 0              |
| Novosphingobium            | 0             | 1.8 (1.3)    | 0               | 0              |
| Allobaculum                | 4.4 (3.6)     | 0            | 0               | 0              |
| Escherichia                | 0             | 1 (0.6)      | 0.33            | 0.65 (0.4)     |
| <b>Skin of Head</b>        |               |              |                 |                |
| Morganella                 | 0             | 0 (0)        | 0               | 32 (11.2)      |
| Staphylococcus*            | 0             | 12 (6)       | 0.1             | 0.07 (0.1)     |
| Campylobacter              | 0             | 0 (0)        | 62              | 0              |
| Bacillus                   | 3.0           | 3.2 (3.1)    | 0.03            | 2.3 (1.9)      |
| Proteus*                   | 0             | 0 (0)        | 0               | 5.1 (1.8)      |
| Pseudomonas                | 0             | 1.5 (1)      | 0               | 3.6 (1.4)      |
| Enterococcus               | 0             | 3.3 (1.2)    | 0               | 0.05 (0)       |
| Burkholderia               | 0             | 3.2 (2.7)    | 0               | 0              |
| Novosphingobium            | 0             | 2.6 (2.3)    | 0               | 0              |
| Stenotrophomonas           | 0             | 2.2 (2.2)    | 0               | 0              |
| Escherichia                | 3.4           | 1.5 (0.5)    | 0               | 0.28 (0.2)     |
| Acinetobacter              | 0.63          | 1.9 (1.9)    | 0.27            | 0.06 (0.1)     |
| Sphingobacterium           | 0             | 0            | 0               | 1.8 (1)        |
| <b>Soil</b>                |               |              |                 |                |
| Bacillus*                  | 81 (1)        | 17 (3.2)     | 0 (0.2)         | 3.3 (0.7)      |
| DA101*                     | 0             | 0            | 8.5 (0.9)       | 7.6 (0.9)      |
| Morganella                 | 0             | 0            | 0               | 6.5 (6.5)      |
| Rhodoplanes                | 0             | 0.09 (0.1)   | 4.6 (0.3)       | 4.4 (0.7)      |
| Stenotrophomonas           | 0             | 8.3 (7.6)    | 0               | 0.08 (0)       |
| Kaistobacter               | 0             | 0.09 (0.1)   | 2.4 (0.3)       | 3.1 (0.5)      |
| Candidatus Solibacter*     | 0             | 0            | 2.3 (0.3)       | 2.2 (0.3)      |
| Novosphingobium            | 0             | 5.8 (4.8)    | 0               | 0              |
| Burkholderia               | 0             | 5 (3.8)      | 0               | 0              |
| Staphylococcus             | 0             | 4.8 (4.8)    | 0               | 0.08 (0.1)     |
| Pedobacter                 | 0             | 2.5 (2.5)    | 0.24 (0.2)      | 0.56 (0.2)     |
| Candidatus Nitrososphaera* | 0             | 0            | 1.5 (0.3)       | 1.2 (0.2)      |
| Arthrobacter               | 0             | 0.63 (0.6)   | 0.29 (0.1)      | 1.3 (0.2)      |
| A4                         | 0             | 0            | 1.6 (0.2)       | 1 (0.2)        |
| Brochothrix                | 4.6 (0.1)     | 0.06 (0)     | 0               | 0.16 (0.1)     |
| Flavisolibacter            | 0             | 0            | 0.69 (0.1)      | 0.76 (0.2)     |
| Acinetobacter              | 0.2 (0.2)     | 0.06 (0)     | 0.51 (0.4)      | 0.72 (0.6)     |
| Paenibacillus              | 0             | 1.7 (0.7)    | 0.1 (0.1)       | 0              |
| Thermomonas                | 0             | 0            | 0.86 (0.2)      | 0.56 (0.1)     |
